# Supplementary material for: Quantification of uncertainties in OCO-2 measurements of XCO 2 :simulations and linear error analysis
Source: Copernicus journal article supplement (doi:10.5194/amt-9-5227-2016), 2016-10-27
Supplement: Supplementary file 1 [file amt-9-5227-2016-supplement.pdf]

Supplement of Atmos. Meas. Tech., 9, 5227–5238, 2016  
<http://www.atmos-meas-tech.net/9/5227/2016/>  
doi:10.5194/amt-9-5227-2016-supplement  
© Author(s) 2016. CC Attribution 3.0 License.

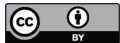

*Supplement of*

## **Quantification of uncertainties in OCO-2 measurements of XCO<sub>2</sub>: simulations and linear error analysis**

**Brian Connor et al.**

*Correspondence to:* Brian Connor ([bc.scientific.consulting@gmail.com](mailto:bc.scientific.consulting@gmail.com))

The copyright of individual parts of the supplement might differ from the CC-BY 3.0 licence.

The following figures show the sensitivity of retrieved XCO<sub>2</sub> to interference error  
5 caused by aerosol. Five composite aerosol types are shown, dust (DU), sea salt (SS),  
black carbon (BC), organic carbon (OC), and sulfate (SO). Each aerosol is considered  
separately in 2 layers, at  $\sigma = 0.95$  and  $\sigma = 0.5$ . See section 3.3.1 of the paper for  
details of the aerosol definitions and calculations.

10 In the figure labels, interference in the lower layer is referred to as ‘Interference\_1’  
while the upper layer is ‘Interference\_2’. All figures show the response of XCO<sub>2</sub> to  
an error, or variability, of AOD = 0.1 in the relevant layer and aerosol type. All  
figures are plotted on the same scale and with the same color sequence, to aide  
comparability.

15

20

25

30

35

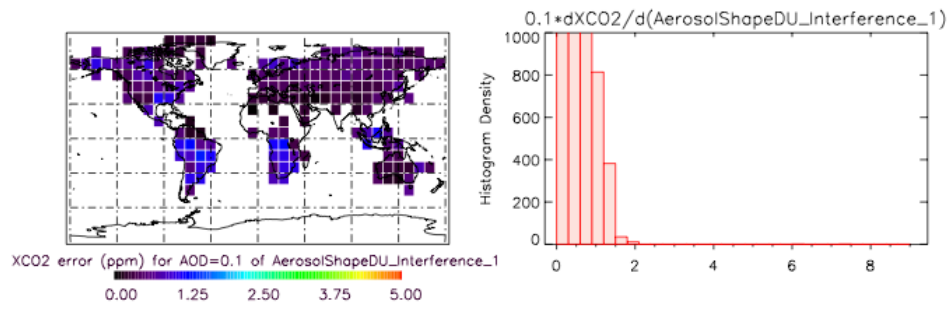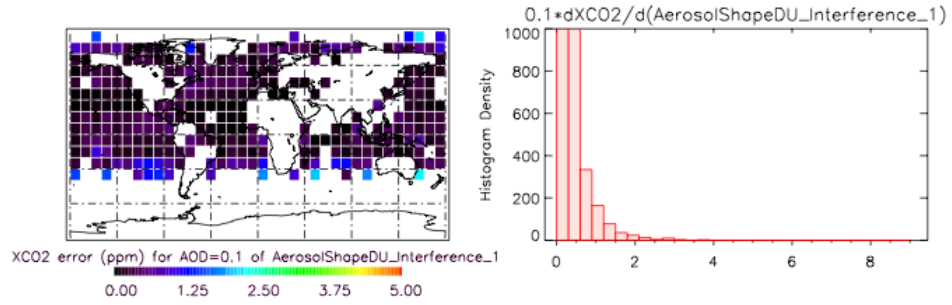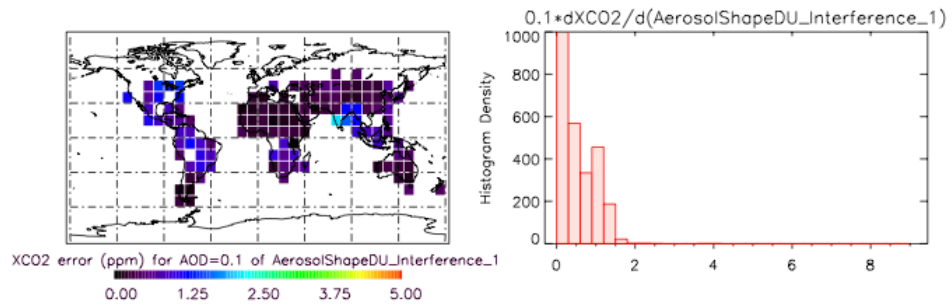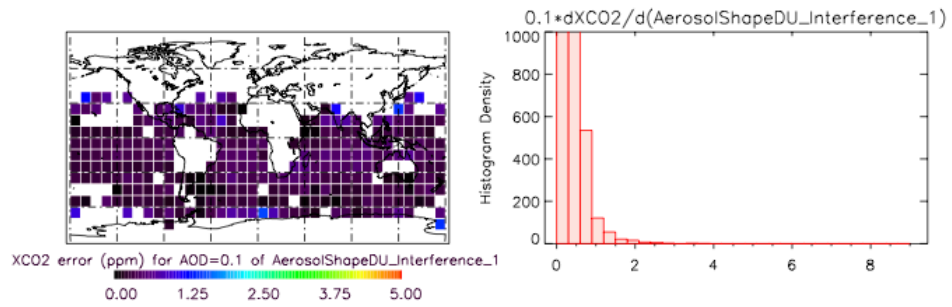

40

Figure U1. Dust (DU) in the layer surface - 750 hPa

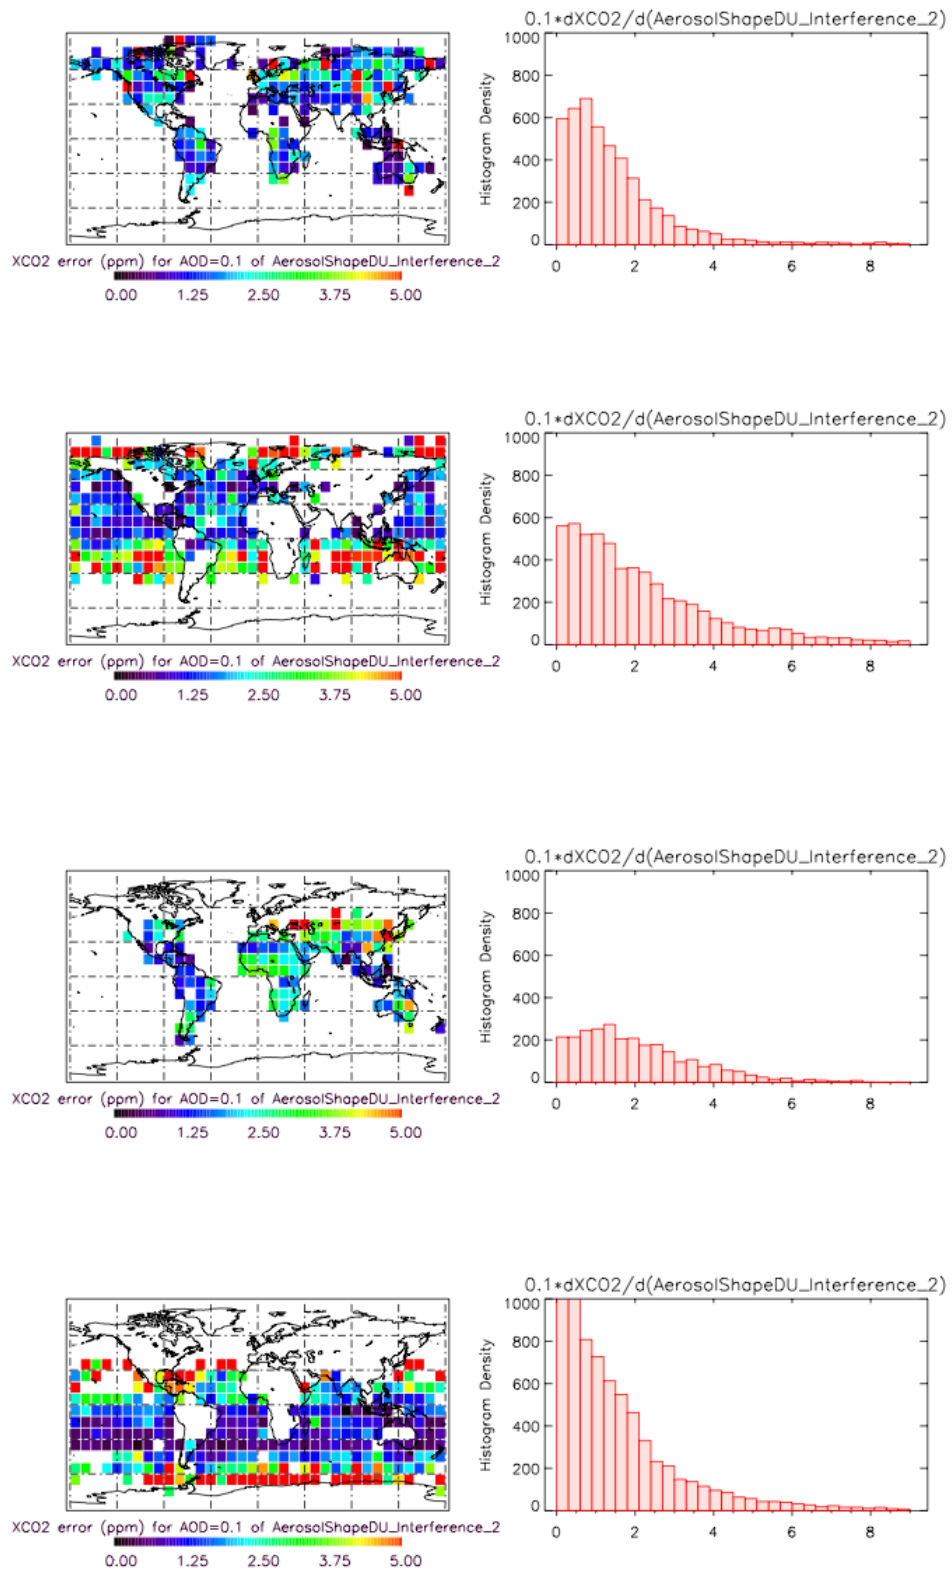

45

Figure U2. Dust (DU) in the layer 750 hPa – top of atmosphere

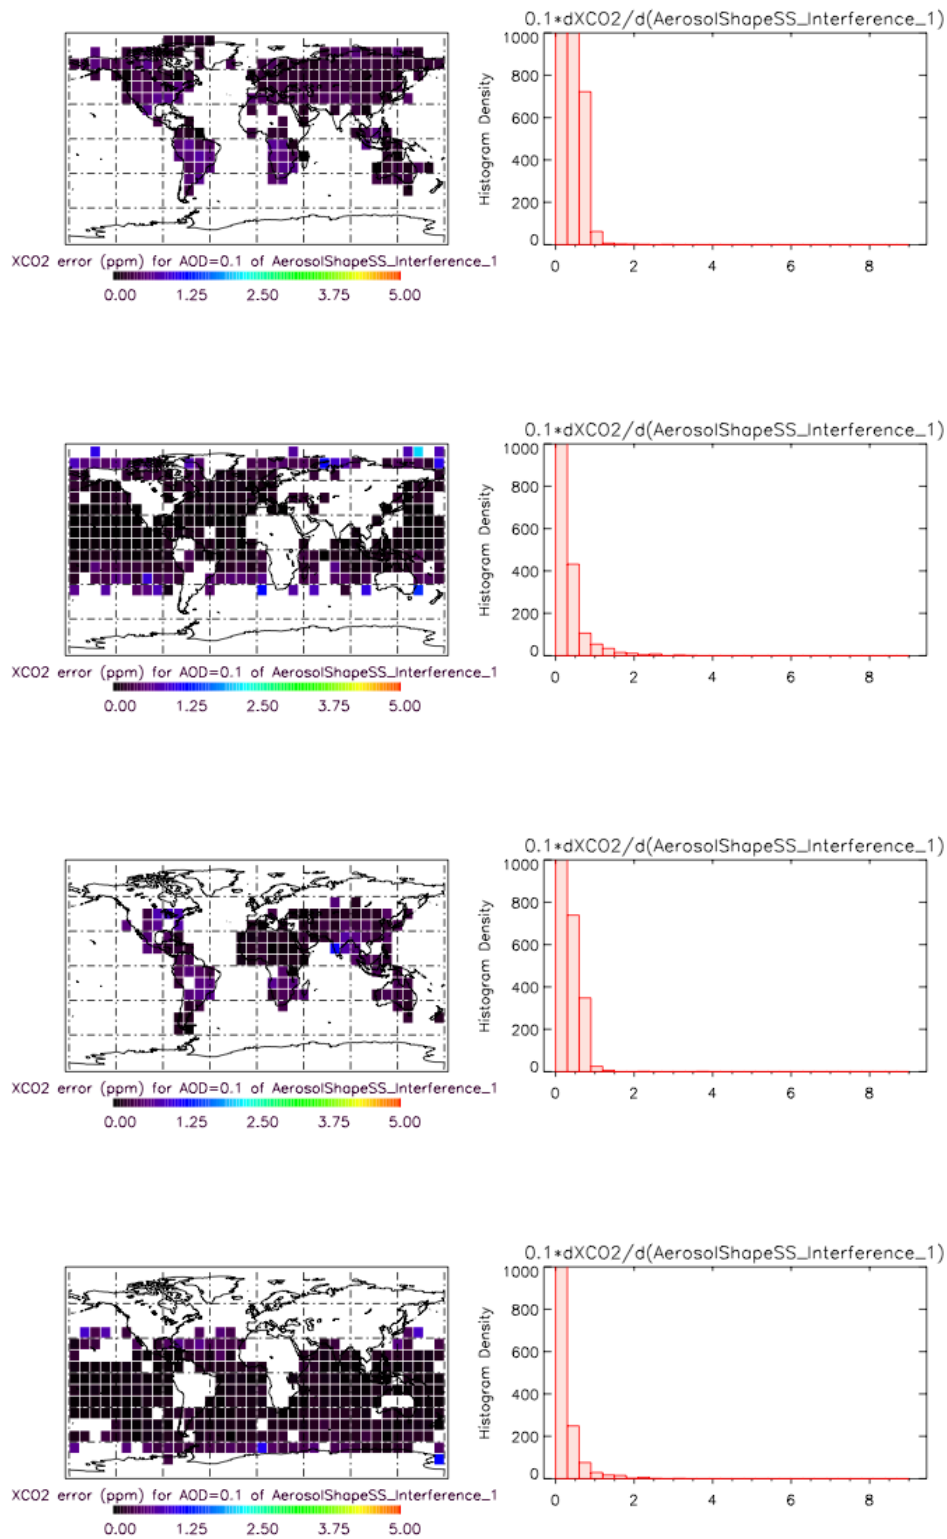

50

Figure U3. Sea salt (SS) in the layer surface - 750 hPa

55

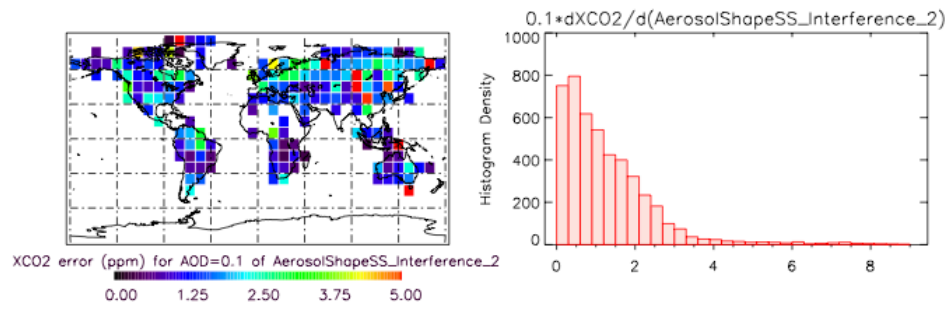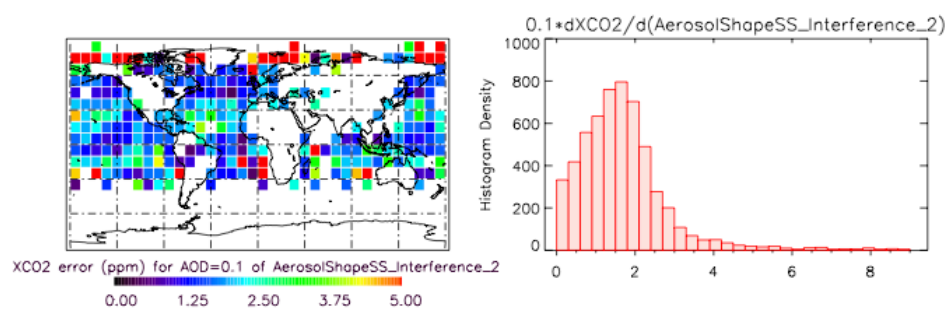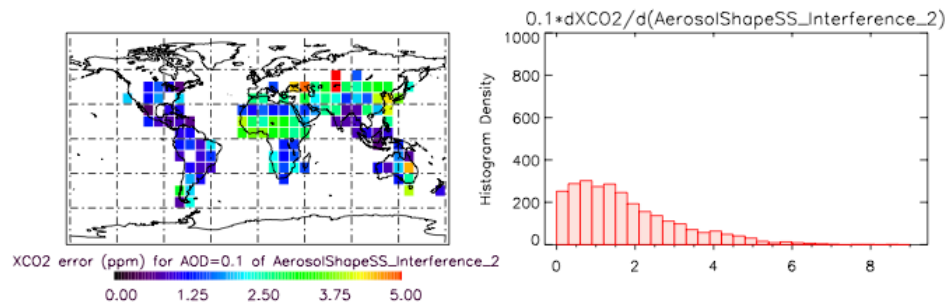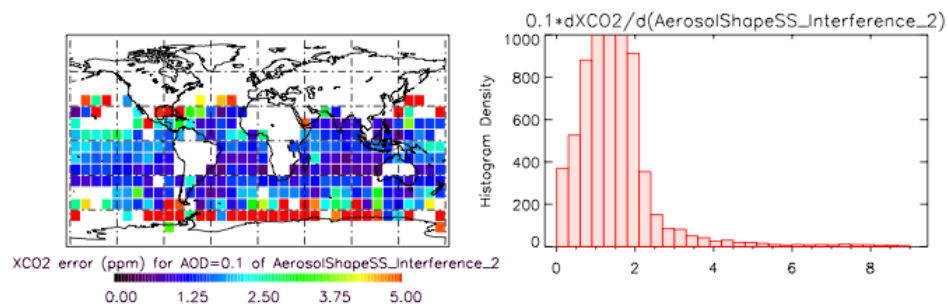

Figure 4. Sea salt (SS) in the layer 750 hPa – top of atmosphere

60

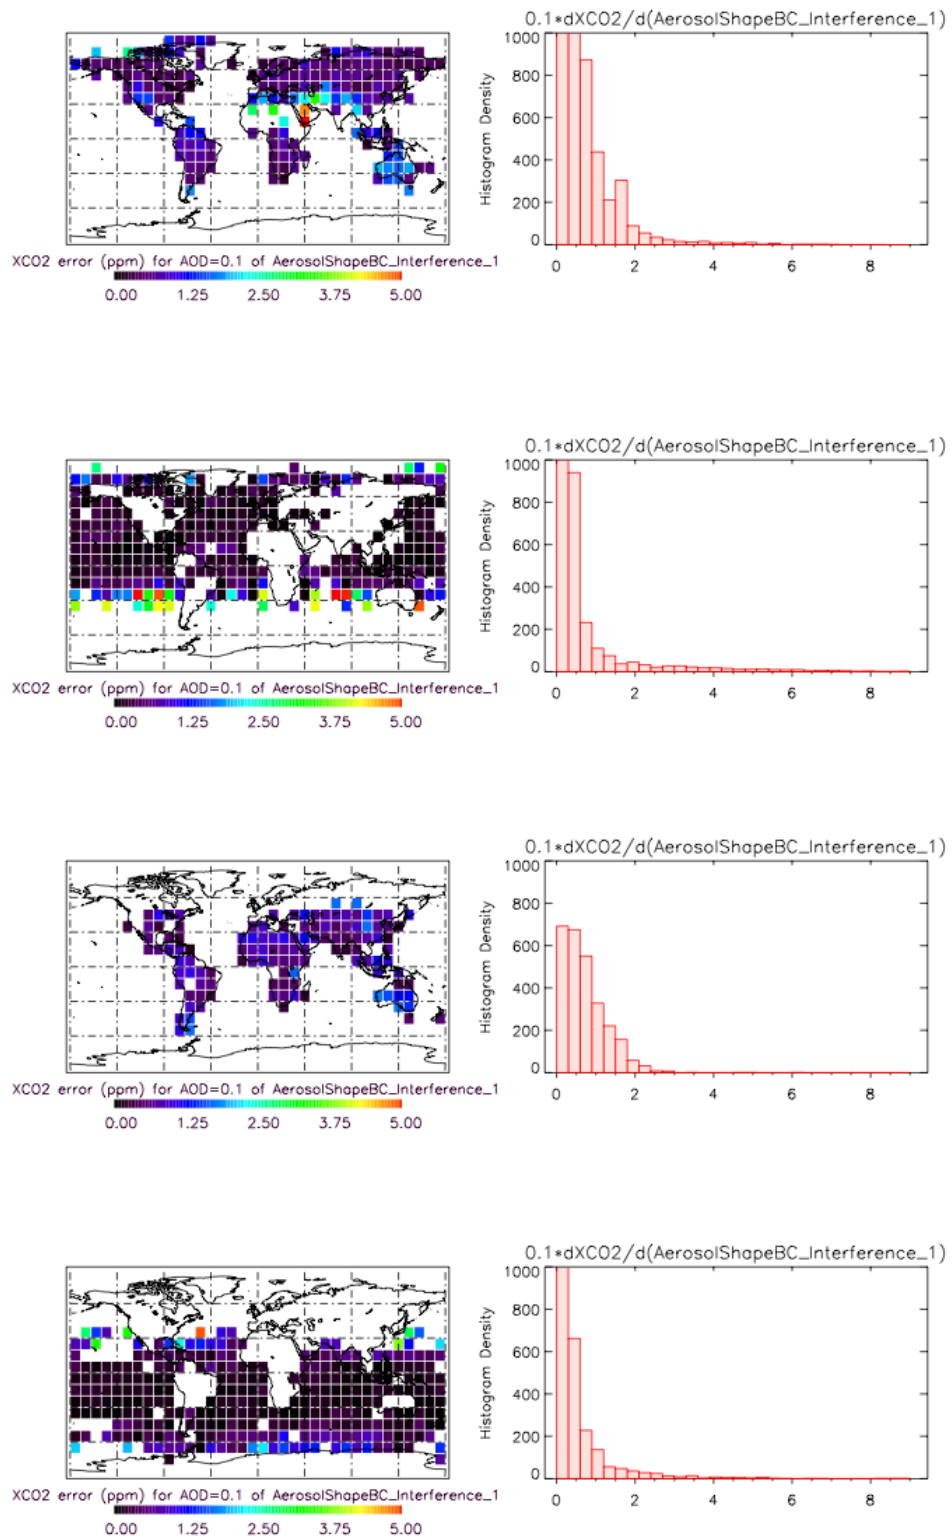

65 Figure S5. Black carbon (BC) in the layer surface - 750 hPa

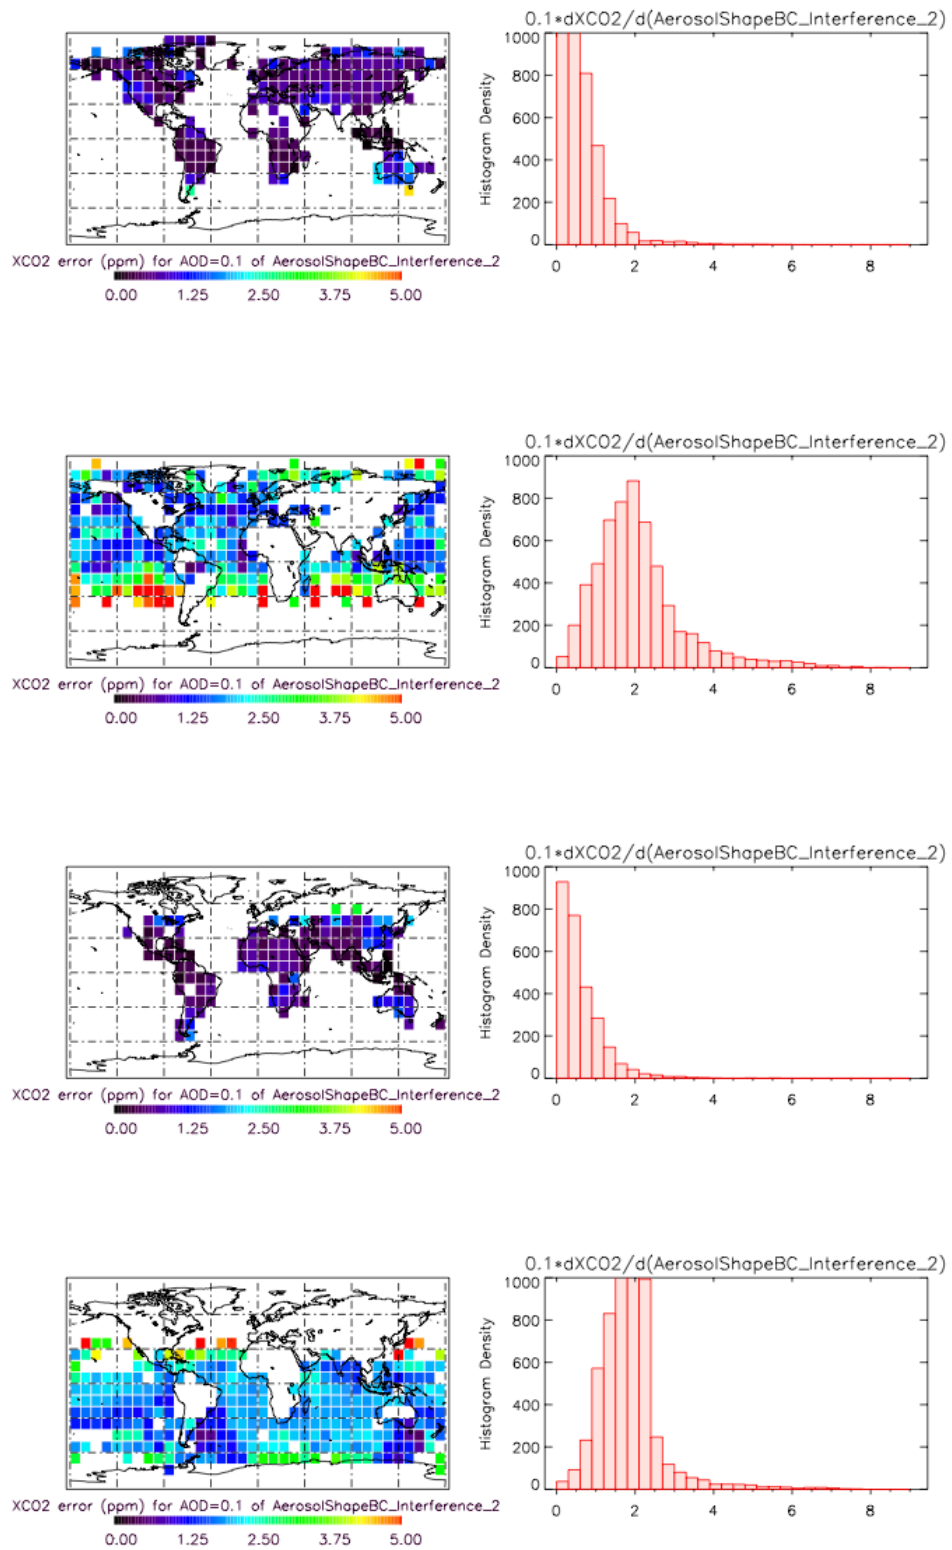

70

Figure S6. Black carbon (BC) in the layer 750 hPa – top of atmosphere



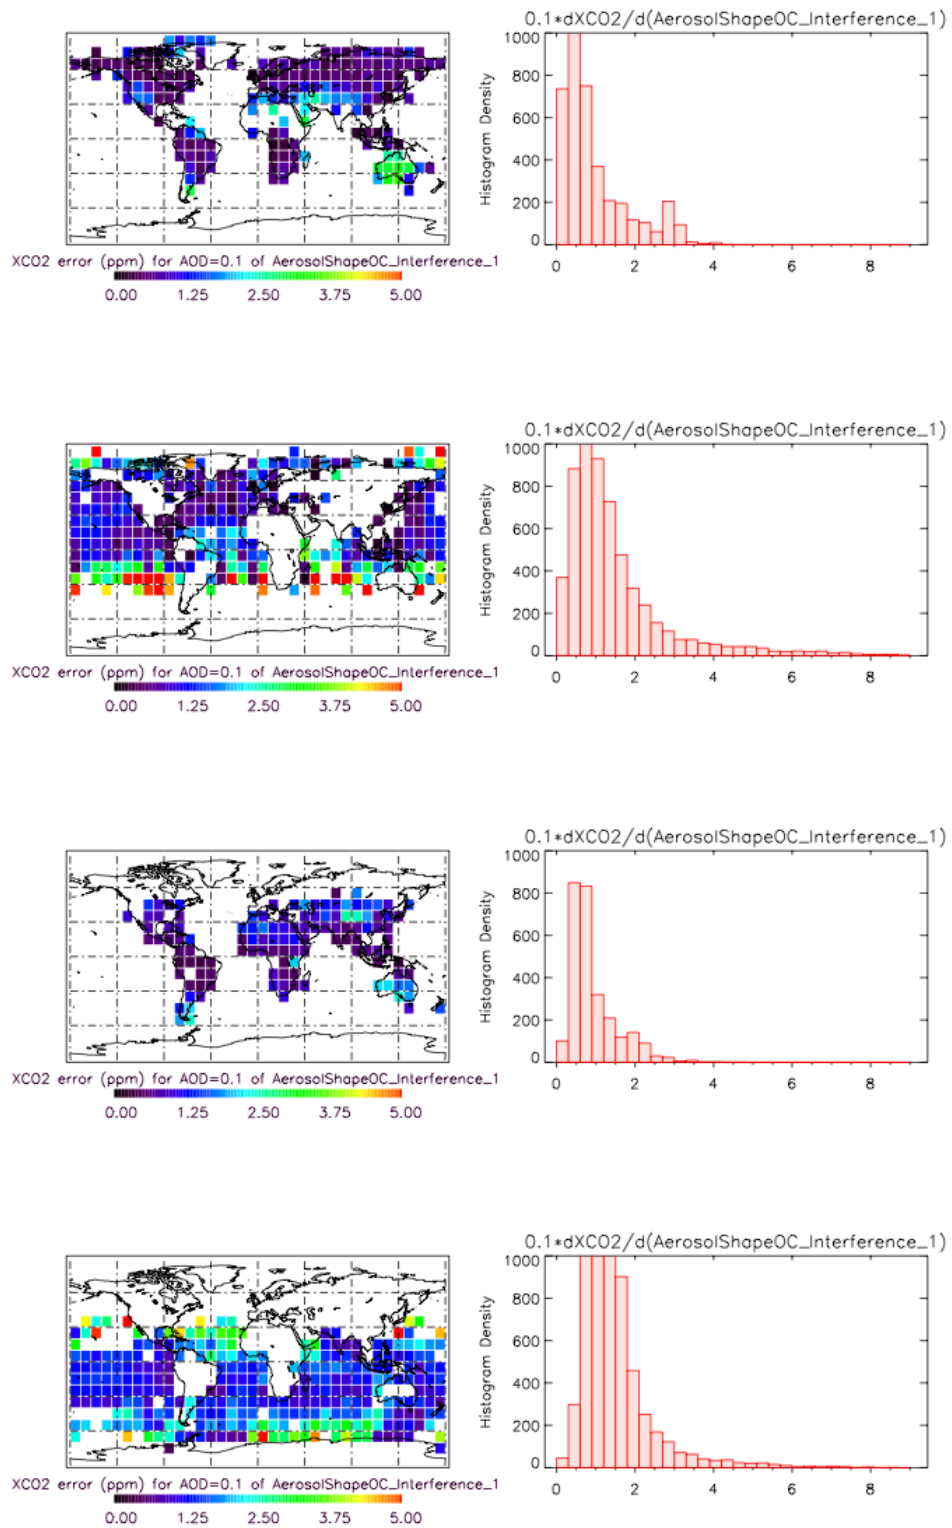

75

Figure S7. Organic carbon (OC) in the layer surface - 750 hPa

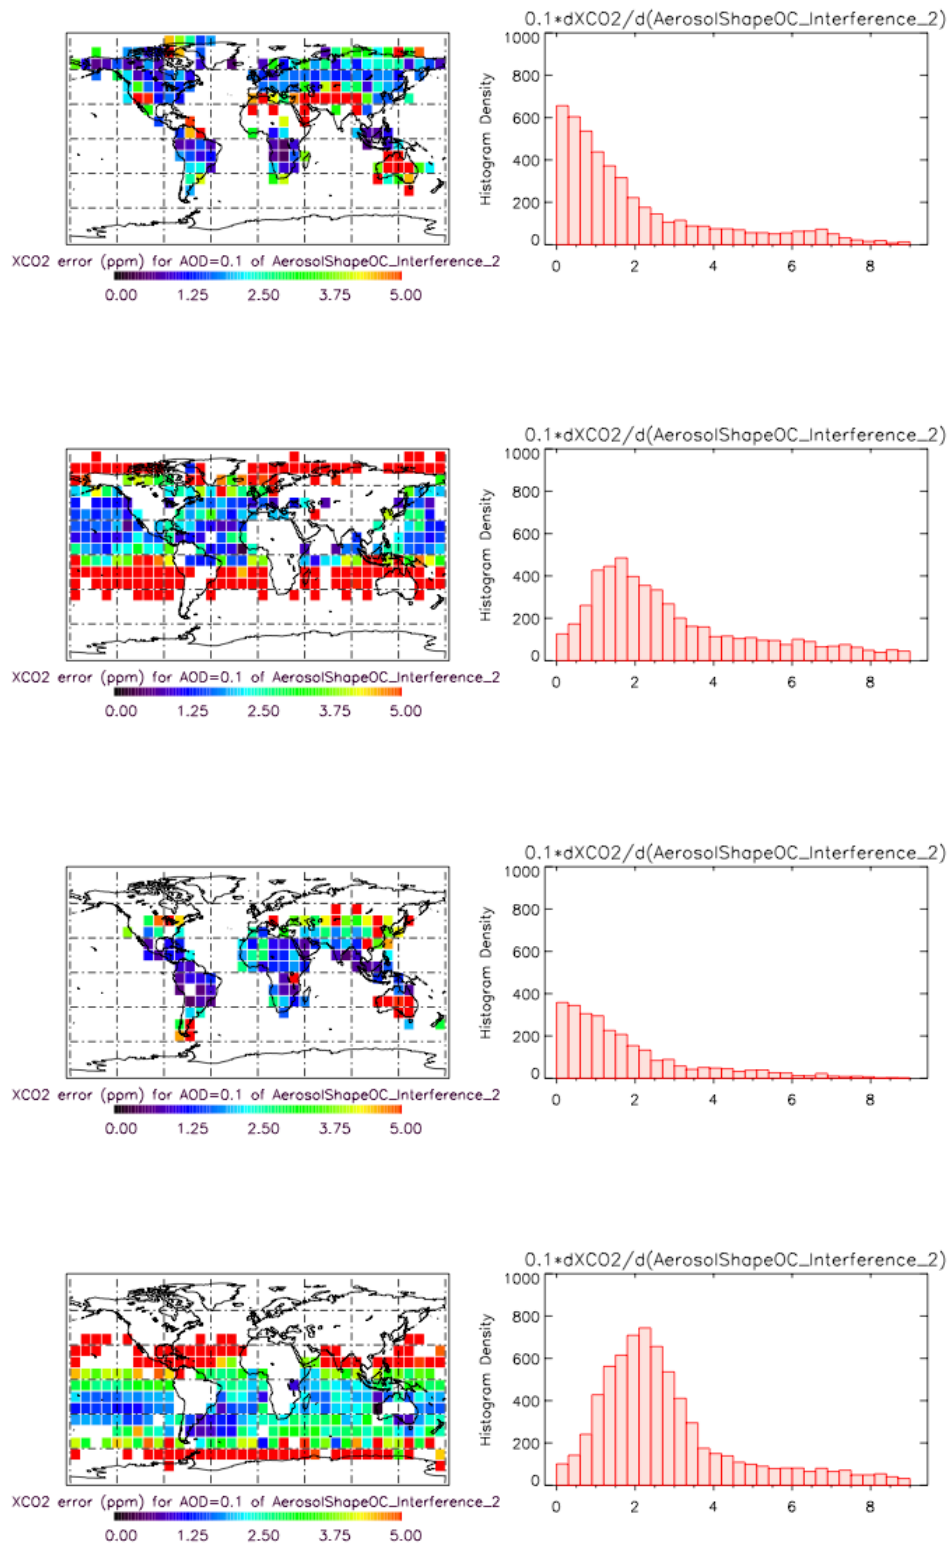

80

Figure S8. Organic carbon (OC) in the layer 750 hPa – top of atmosphere

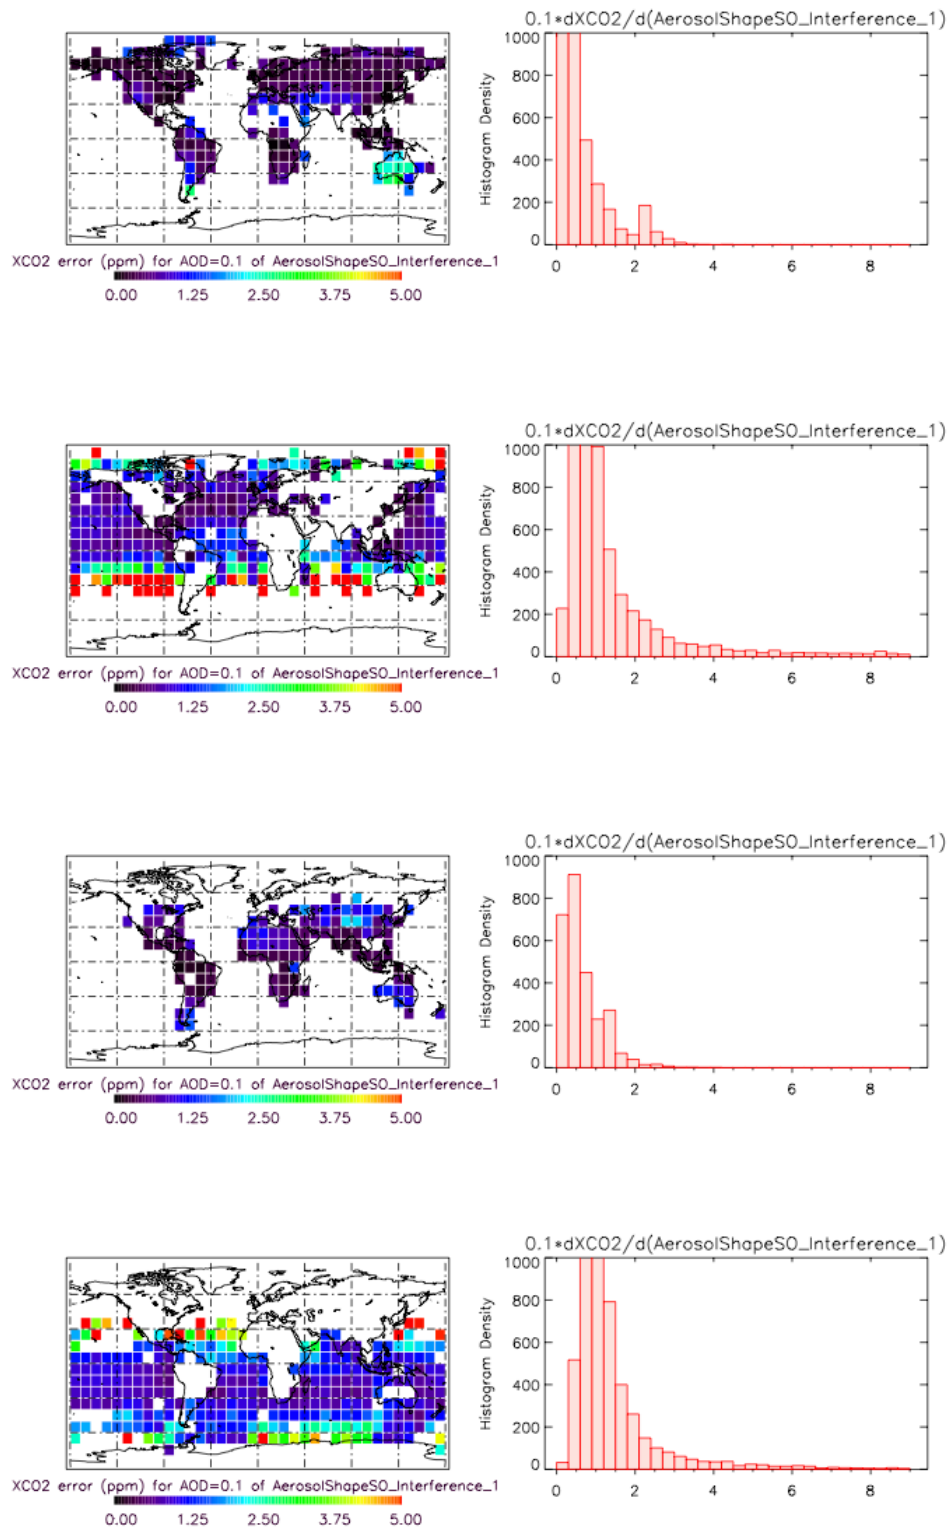

Figure S9. Sulfate (SO) in the layer surface - 750 hPa

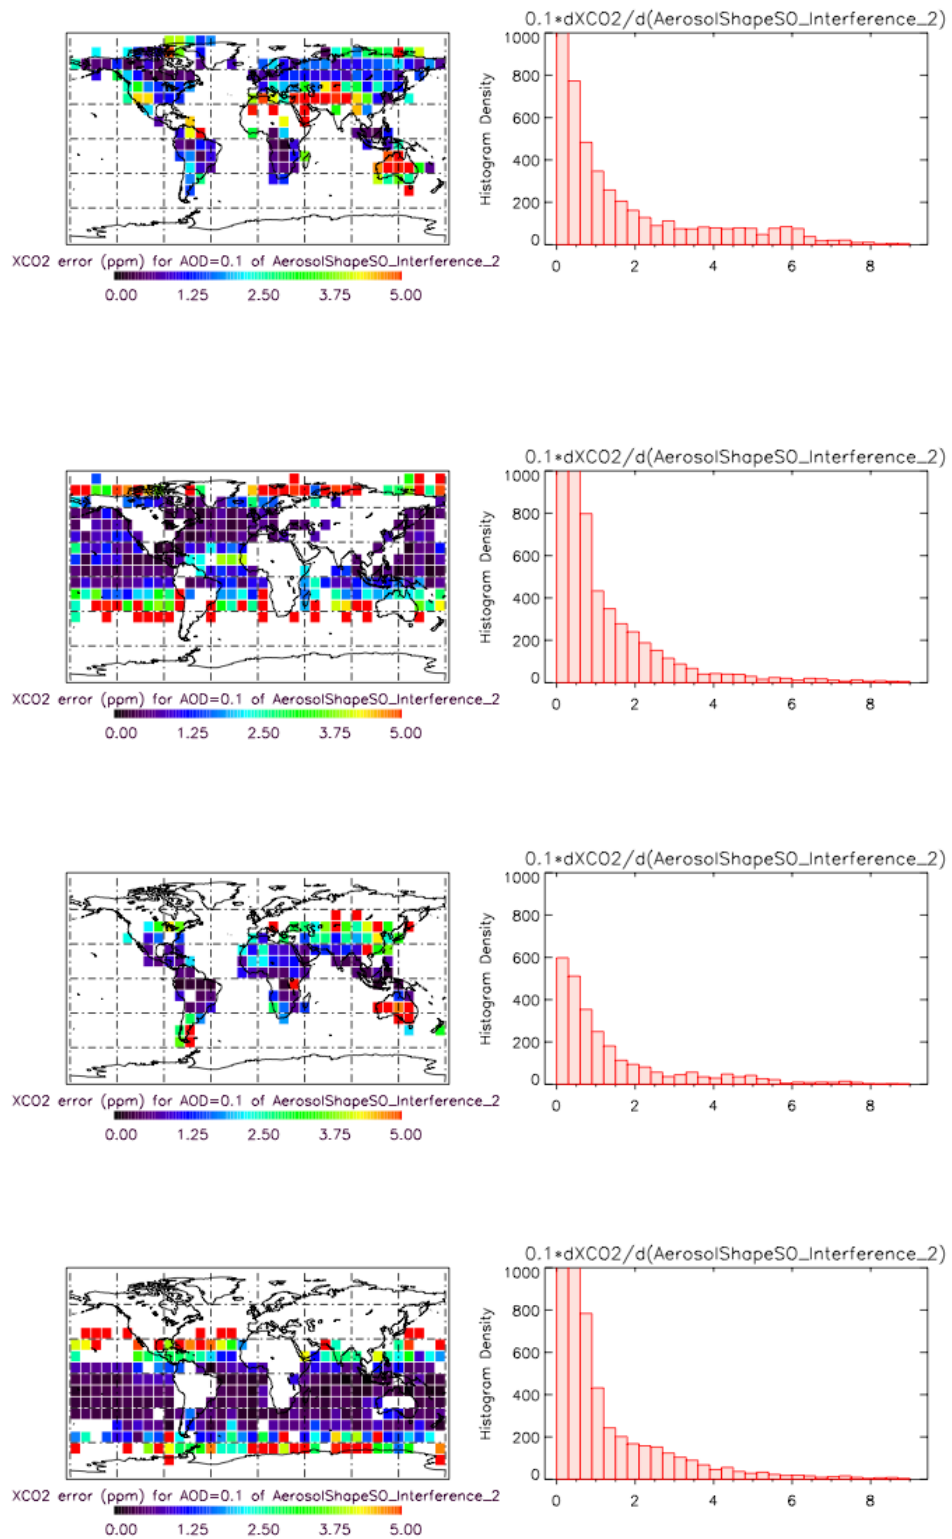

95

Figure S10. Sulfate (SO) in the layer 750 hPa – top of atmosphere
